# Supplementary material for: Heavy doping of S2 in Cu7.2S4 lattice into chemically homogeneous superlattice Cu7.2Sx nanowires: strong photoelectric response
Source: Royal Society of Chemistry journal article supplement (doi:10.1039/c4tc01803f), 2015-01-01
Supplement: c4tc01803f1.pdf [file c4tc01803f1.pdf]

## Electronic Supplementary Information

### Heavy Doping of S<sub>2</sub> in Cu<sub>7.2</sub>S<sub>4</sub> Lattice into Chemically Homogeneous Superlattice Cu<sub>7.2</sub>S<sub>x</sub> Nanowires: Strong Photoelectric Response

Y. H. Gao,<sup>a,\*</sup> P. P. Wang,<sup>b</sup> M. H. Zhang,<sup>a</sup> Y. Lei,<sup>a</sup> H. L. Niu,<sup>c</sup> P. J. Li,<sup>a</sup> W. J. Fa<sup>a</sup> and Z. Zheng<sup>a,\*</sup>

<sup>a</sup>Key Laboratory of Micro-Nano Materials for Energy Storage and Conversion of Henan Province, Institute of Surface Micro and Nano Materials, Xuchang University, Henan 461000, China.

Fax: +86-374-2968988

E-mail: [zhengzhi99999@gmail.com](mailto:zhengzhi99999@gmail.com) or [gyh-2007@sohu.com](mailto:gyh-2007@sohu.com)

#### EDS spectrum of the obtained Cu<sub>7.2</sub>S<sub>x</sub> products.

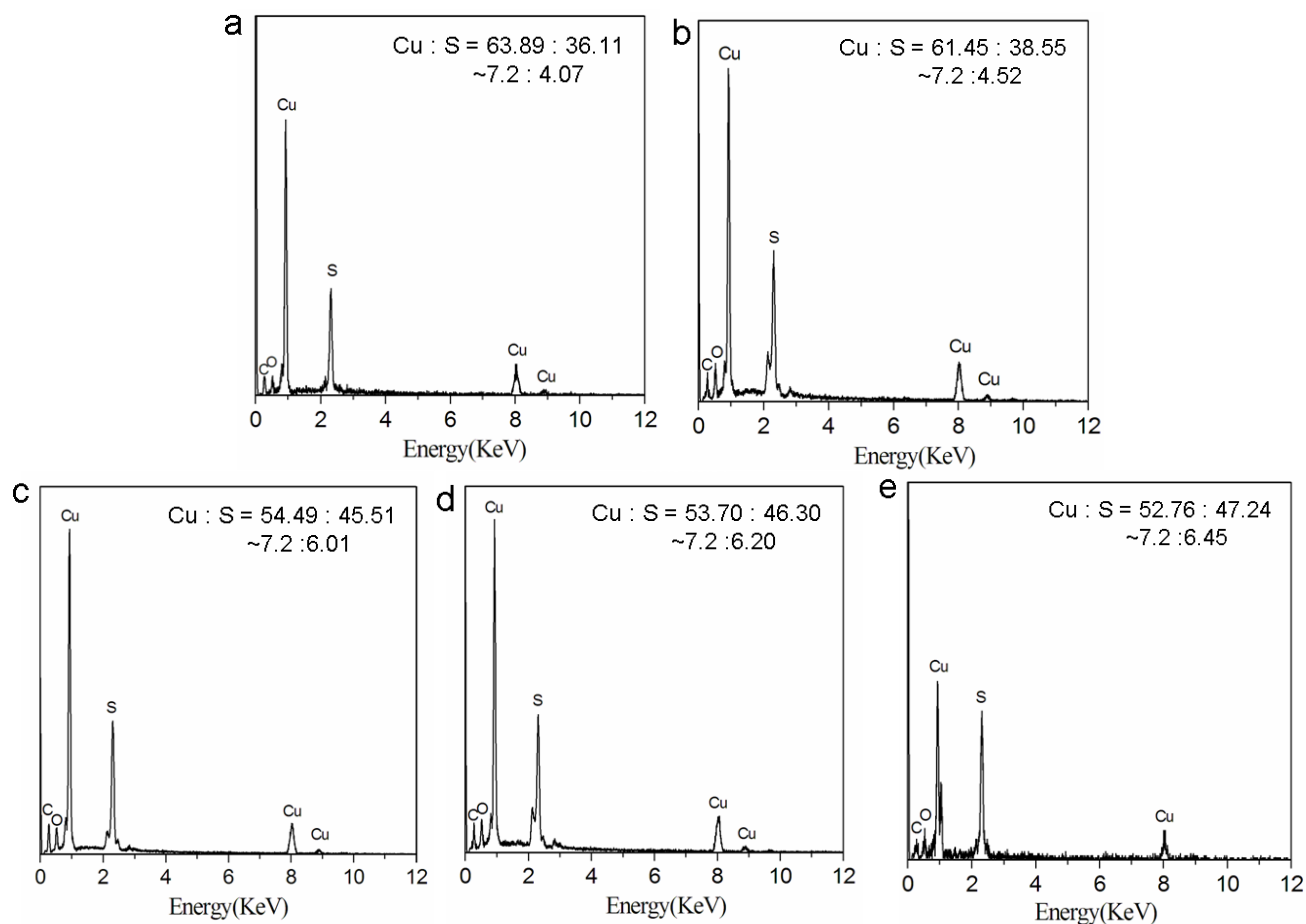

**Figure S1** EDS spectrum of the obtained Cu<sub>7.2</sub>S<sub>x</sub> products. Patterns of a)  $x = 4.07$ ; b)  $x = 4.52$ ; c)  $x = 6.01$ ; d)  $x = 6.20$ ; e)  $x = 6.45$ .
